# Supplementary material
Source: PubMed Central journal article supplement (PMC7572664)
Supplement: NIHMS1622598-supplement-1.pdf [file NIHMS1622598-supplement-1.pdf]

**Supplementary Table 1.** Performance of gene expression prediction models built

| <b>Prediction performance (<math>R^2</math>)</b> | <b>All</b> | <b>Protein</b> | <b>lncRNAs</b> | <b>miRNAs</b> |
|--------------------------------------------------|------------|----------------|----------------|---------------|
| $\geq 0.01$                                      | 8479       | 6788           | 1690           | 1             |
| $\geq 0.04$                                      | 5623       | 4495           | 1127           | 1             |
| $\geq 0.09$                                      | 3350       | 2656           | 693            | 1             |
| $\geq 0.16$                                      | 2010       | 1602           | 408            | 0             |

Protein: Protein coding genes; lncRNAs: long non-coding RNAs; miRNAs: microRNAs.





**Supplementary Table 4.** The functions of *RCCD1*, and *CFDPI* and their reported links with human cancers

| Region  | Gene name    | Functions                                                                                                                                                                                                                                                                       | Cancer                    | References (PMID) |
|---------|--------------|---------------------------------------------------------------------------------------------------------------------------------------------------------------------------------------------------------------------------------------------------------------------------------|---------------------------|-------------------|
| 15q26.1 | <i>RCCD1</i> | The <i>RCCD1</i> ( <i>RCC1</i> domain-containing protein 1) protein plays an important role in regulating alpha-tubulin deacetylation and cytoskeletal microtubule stability, thereby promoting cell migration and TGF-beta-induced epithelial to mesenchymal transition (EMT). | Lung cancer               | 31582214          |
|         |              |                                                                                                                                                                                                                                                                                 |                           | 28455245          |
|         |              |                                                                                                                                                                                                                                                                                 | Breast cancer             | 28362817          |
|         |              |                                                                                                                                                                                                                                                                                 | Ovarian cancer            | 27432226          |
| 16q23.1 | <i>CFDPI</i> | Gene <i>CFDPI</i> (Craniofacial development protein 1) is 139,815 bp long with 7 exons and 6 introns and maps to chromosome 16 in the band 16q22.2-q22.3. <i>CFDPI</i> gene expression has been detected in a wide range of cancer tissues.                                     | Esophageal adenocarcinoma | 31891614          |
|         |              |                                                                                                                                                                                                                                                                                 | Angiotropic melanoma      | 23275074          |

**Supplementary Table 5.** Associations of genes identified in Zhong et al. with pancreatic cancer risk in the present study

| Previous TWAS (Zhong et al.) |                 |            |                   |                |                        | The present study                              |            |                       |
|------------------------------|-----------------|------------|-------------------|----------------|------------------------|------------------------------------------------|------------|-----------------------|
| Region                       | Gene name       | Approach   | Training tissue   | Z              | P value after FDR      | OR                                             | 95% CI     | P value               |
| 1p36.12                      | <i>CELA3B</i>   | FUSION     | GTEEx pancreas    | -3.98          | $6.89 \times 10^{-5}$  | 1.02                                           | 0.09-11.49 | 0.99                  |
|                              |                 | FUSION     | Combined pancreas | -4.62          | $3.80 \times 10^{-6}$  |                                                |            |                       |
|                              |                 | MetaXcan   | GTEEx pancreas    | -4.43          | $9.38 \times 10^{-6}$  |                                                |            |                       |
|                              |                 | MetaXcan   | Combined pancreas | -4.29          | $1.83 \times 10^{-5}$  |                                                |            |                       |
| 5p15.33                      | <i>TERT</i>     | SMulTiXcan | Cross tissue      | -8.24 to 4.20  | $5.80 \times 10^{-18}$ | No prediction model with $R^2 \geq 0.01$ built |            |                       |
| 5p15.33                      | <i>CLPTMIL</i>  | SMulTiXcan | Cross tissue      | -8.33 to 0.91  | $1.48 \times 10^{-16}$ | No prediction model with $R^2 \geq 0.01$ built |            |                       |
| 5p15.33                      | <i>ZDHHC11B</i> | SMulTiXcan | Cross tissue      | -1.6 to 3.13   | $3.18 \times 10^{-6}$  | 1.21                                           | 0.94-1.56  | 0.13                  |
| 7p14.1                       | <i>INHBA</i>    | MetaXcan   | GTEEx pancreas    | -5.11          | $3.20 \times 10^{-7}$  | 0.56                                           | 0.47-0.68  | $8.44 \times 10^{-7}$ |
|                              |                 | SMulTiXcan | Cross tissue      | -5.11 to -0.72 | $4.10 \times 10^{-6}$  |                                                |            |                       |
| 9p31.1                       | <i>SMC2</i>     | FUSION     | Combined pancreas | 4.95           | $7.52 \times 10^{-7}$  | 2.80                                           | 2.04-3.83  | $7.71 \times 10^{-8}$ |
|                              |                 | MetaXcan   | Combined pancreas | 4.93           | $8.19 \times 10^{-7}$  |                                                |            |                       |
|                              |                 | SMulTiXcan | Cross tissue      | -3.34 to 5.35  | $8.50 \times 10^{-6}$  |                                                |            |                       |
| 9p31.1                       | <i>SMC2-AS1</i> | SMulTiXcan | Cross tissue      | -4.9 to 4.8    | $1.39 \times 10^{-5}$  | No prediction model with $R^2 \geq 0.01$ built |            |                       |
| 9q34.2                       | <i>ABO</i>      | FUSION     | LTG pancreas      | 9.38           | $6.71 \times 10^{-21}$ | 1.25                                           | 1.17-1.33  | $1.38 \times 10^{-8}$ |
|                              |                 | FUSION     | GTEEx pancreas    | 6.96           | $3.44 \times 10^{-12}$ |                                                |            |                       |
|                              |                 | FUSION     | Combined pancreas | 7.55           | $4.34 \times 10^{-14}$ |                                                |            |                       |
|                              |                 | MetaXcan   | LTG pancreas      | 10.72          | $8.07 \times 10^{-27}$ |                                                |            |                       |

|          |                    |            |                           |                |                        |                                                |           |                        |
|----------|--------------------|------------|---------------------------|----------------|------------------------|------------------------------------------------|-----------|------------------------|
|          |                    | MetaXcan   | GTE <sub>x</sub> pancreas | 7.08           | $1.41 \times 10^{-12}$ |                                                |           |                        |
|          |                    | MetaXcan   | Combined pancreas         | 7.65           | $2.05 \times 10^{-14}$ |                                                |           |                        |
| 10q23.31 | <i>RP11-80H5.9</i> | SMulTiXcan | Cross tissue              | -2.21 to 4.4   | $8.23 \times 10^{-6}$  | No prediction model with $R^2 \geq 0.01$ built |           |                        |
| 12q13.13 | <i>SMUG1</i>       | FUSION     | GTE <sub>x</sub> pancreas | -4.04          | $5.40 \times 10^{-5}$  | 0.90                                           | 0.84-0.96 | $3.04 \times 10^{-3}$  |
| 13q12.2  | <i>PDX1</i>        | MetaXcan   | GTE <sub>x</sub> pancreas | -7.18          | $6.85 \times 10^{-13}$ | 0.50                                           | 0.42-0.60 | $5.29 \times 10^{-10}$ |
|          |                    | SMulTiXcan | Cross tissue              | -7.18 to -6.59 | $4.87 \times 10^{-12}$ |                                                |           |                        |
| 13q22.1  | <i>KLF5</i>        | FUSION     | GTE <sub>x</sub> pancreas | 4.91           | $9.17 \times 10^{-7}$  | No prediction model with $R^2 \geq 0.01$ built |           |                        |
|          |                    | FUSION     | Combined pancreas         | 5.92           | $3.15 \times 10^{-9}$  |                                                |           |                        |
| 14q32.33 | <i>BTBD6</i>       | FUSION     | GTE <sub>x</sub> pancreas | 4.06           | $4.98 \times 10^{-5}$  | 1.52                                           | 1.14-2.02 | $4.56 \times 10^{-3}$  |
|          |                    | FUSION     | Combined pancreas         | 4.00           | $6.30 \times 10^{-5}$  |                                                |           |                        |
| 15q23    | <i>HEXA</i>        | FUSION     | Combined pancreas         | -4.02          | $5.68 \times 10^{-5}$  | No prediction model with $R^2 \geq 0.01$ built |           |                        |
| 15q26.1  | <i>RCCD1</i>       | FUSION     | LTG pancreas              | -3.98          | $6.94 \times 10^{-5}$  | 0.85                                           | 0.79-0.91 | $2.48 \times 10^{-4}$  |
|          |                    | FUSION     | GTE <sub>x</sub> pancreas | -4.04          | $5.38 \times 10^{-5}$  |                                                |           |                        |
|          |                    | FUSION     | Combined pancreas         | -3.99          | $6.52 \times 10^{-5}$  |                                                |           |                        |
| 16q23.1  | <i>WDR59</i>       | FUSION     | Combined pancreas         | -4.70          | $2.54 \times 10^{-6}$  | No prediction model with $R^2 \geq 0.01$ built |           |                        |
| 16q23.1  | <i>CFDPI</i>       | FUSION     | LTG pancreas              | 6.07           | $1.26 \times 10^{-9}$  | 1.51                                           | 1.33-1.72 | $1.29 \times 10^{-7}$  |
|          |                    | FUSION     | Combined pancreas         | 5.76           | $8.47 \times 10^{-9}$  |                                                |           |                        |
|          |                    | MetaXcan   | Combined pancreas         | 5.58           | $2.40 \times 10^{-8}$  |                                                |           |                        |
|          |                    | SMulTiXcan | Cross tissue              | 2.50 to 6.89   | $2.02 \times 10^{-8}$  |                                                |           |                        |

|          |                      |            |                           |               |                       |                                                |           |                       |
|----------|----------------------|------------|---------------------------|---------------|-----------------------|------------------------------------------------|-----------|-----------------------|
| 16q23.1  | <i>BCAR1</i>         | SMulTiXcan | Cross tissue              | -5.60 to 6.49 | $1.94 \times 10^{-7}$ | No prediction model with $R^2 \geq 0.01$ built |           |                       |
| 16q23.1  | <i>TMEM170A</i>      | SMulTiXcan | Cross tissue              | -3.69 to 2.86 | $1.21 \times 10^{-5}$ | No prediction model with $R^2 \geq 0.01$ built |           |                       |
| 17q12    | <i>PNMT</i>          | FUSION     | LTG pancreas              | 4.86          | $1.20 \times 10^{-6}$ | No prediction model with $R^2 \geq 0.01$ built |           |                       |
| 17q12    | <i>CDK12</i>         | FUSION     | GTE <sub>x</sub> pancreas | -4.05         | $5.15 \times 10^{-5}$ | No prediction model with $R^2 \geq 0.01$ built |           |                       |
| 17q12    | <i>PGAP3</i>         | FUSION     | LTG pancreas              | 3.91          | $9.11 \times 10^{-5}$ | 1.19                                           | 1.10-1.29 | $3.32 \times 10^{-4}$ |
|          |                      | FUSION     | GTE <sub>x</sub> pancreas | 3.98          | $6.96 \times 10^{-5}$ |                                                |           |                       |
|          |                      | MetaXcan   | GTE <sub>x</sub> pancreas | 4.11          | $3.03 \times 10^{-5}$ |                                                |           |                       |
|          |                      | MetaXcan   | Combined pancreas         | 4.17          | $2.98 \times 10^{-5}$ |                                                |           |                       |
| 17q22    | <i>SUPT4H1</i>       | FUSION     | GTE <sub>x</sub> pancreas | 4.12          | $3.72 \times 10^{-5}$ | 1.19                                           | 0.97-1.46 | 0.099                 |
|          |                      | MetaXcan   | GTE <sub>x</sub> pancreas | 4.11          | $3.90 \times 10^{-5}$ |                                                |           |                       |
| 18q11.22 | <i>RP11-888D10.3</i> | MetaXcan   | GTE <sub>x</sub> pancreas | -4.07         | $4.67 \times 10^{-5}$ | No prediction model with $R^2 \geq 0.01$ built |           |                       |
| 19p13.11 | <i>PGPEP1</i>        | MetaXcan   | Combined pancreas         | -4.13         | $3.67 \times 10^{-5}$ | 0.81                                           | 0.73-0.90 | $1.46 \times 10^{-4}$ |

**Supplementary Figure 1. The flowchart of quality control and prediction model training in the reference dataset.** GTEx v8 was used as the reference dataset to build the prediction model. More details can be found in the preprint of the v8 release (1). Totally 838 samples and 49 tissues were included in the model training. The weights were jointly estimated by (penalized) regressing the residual of gene expression on genotypes.

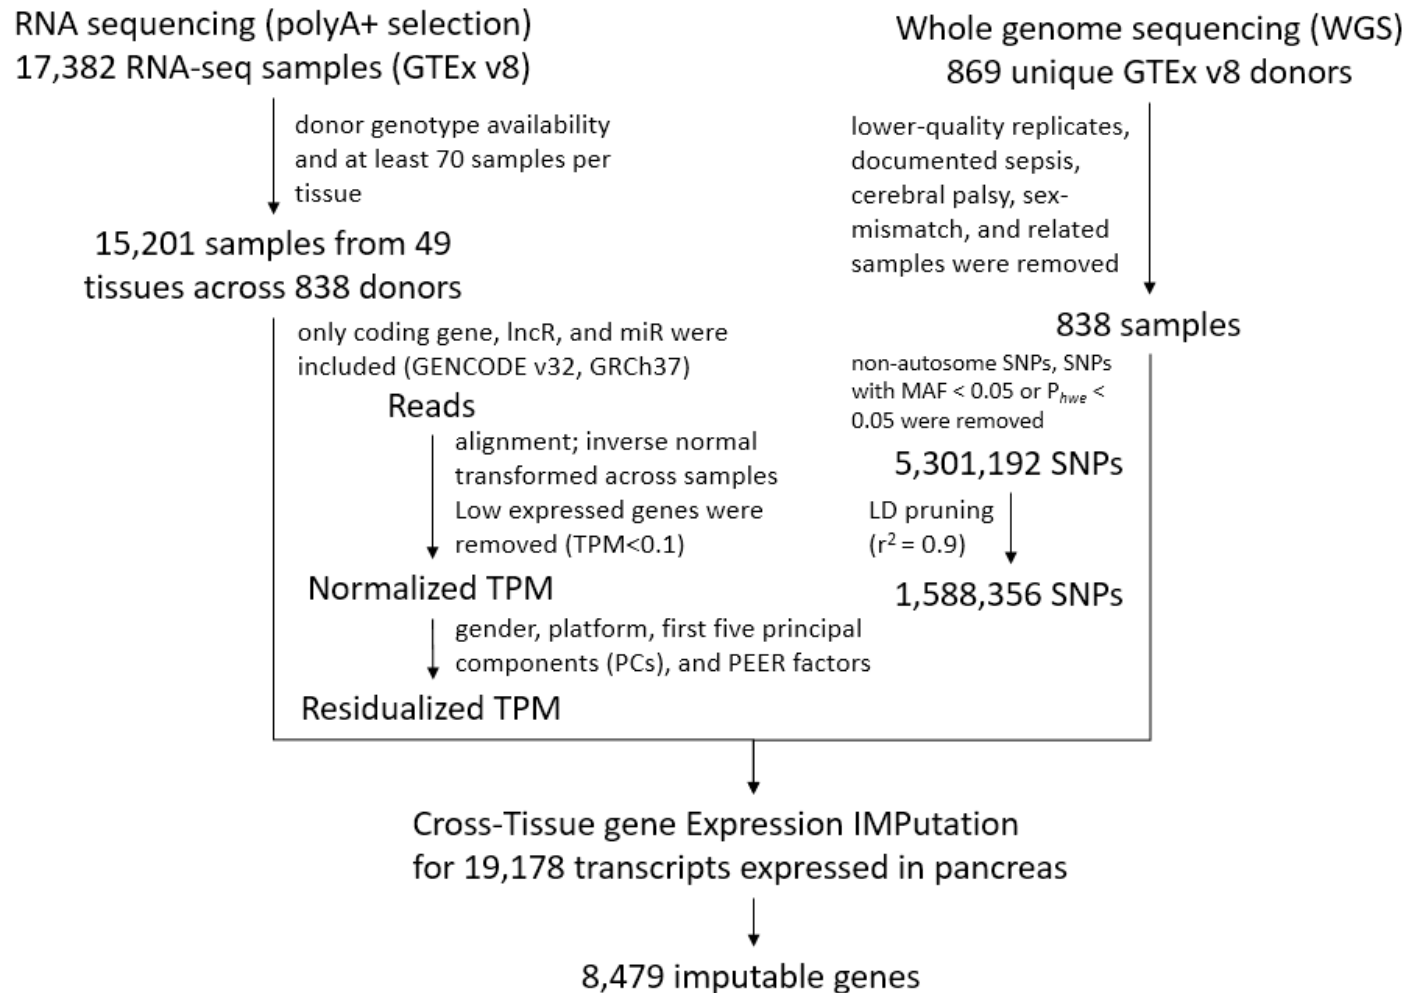



## Reference

1. Aguet F, Barbeira, A. N., Bonazzola, R., Brown, A., Castel, S. E., Jo, B., et al. The GTEx Consortium atlas of genetic regulatory effects across human tissues. BioRxiv2019.
